# Supplementary material for: TM8 represses developmental timing in Nicotiana benthamiana and has functionally diversified in angiosperms
Source: PubMed Central journal article supplement (PMC6013966; doi:10.1186/s12870-018-1349-7), 2018-06-22

**A**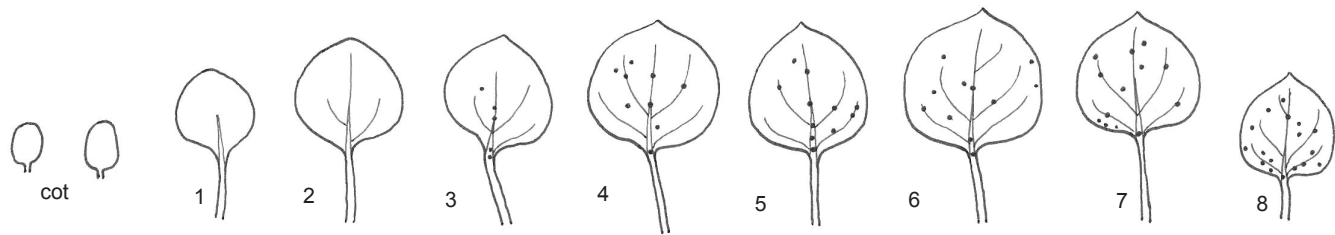**B**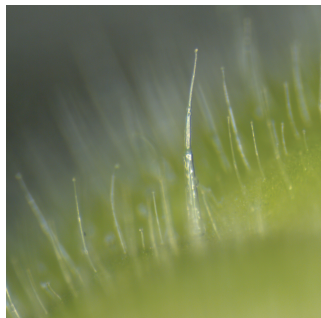**C**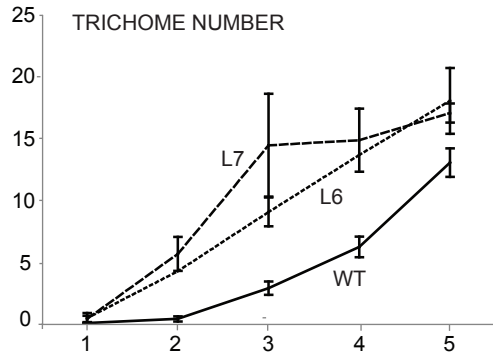**D**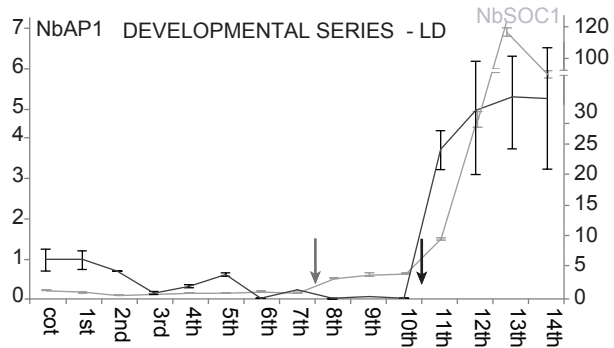

Supplement: 12870_2018_1349_MOESM4_ESM.pdf [file 12870_2018_1349_MOESM4_ESM.pdf]
